# Supplementary material for: Feasibility of Multimodal Physical Therapy in Hispanic American Older Adults with Moderate Knee Osteoarthritis
Source: Research Square preprint supplement (doi:10.21203/rs.3.rs-6256647/v1), 2025-07-03
Supplement: Supplementary file 1 [file 706a58fbe54c86d077e53bd4.docx]

**Project summary**

The Hispanic American older adult population is growing rapidly, and knee osteoarthritis is common. There are few, culturally competent knee osteoarthritis targeted interventions for this population. Hispanic Americans with osteoarthritis report higher levels of pain and greater activity participation limitation compared to other populations and they receive knee replacements at a lower rate, hence conservative treatment options are needed. Strength and cardiovascular exercise and self-management training are consistently recommended by knee osteoarthritis clinical guidelines. The purpose of this observational, pragmatic pre/post study is to explore feasibility of multimodal physical therapy in older Hispanic American adults with moderate knee osteoarthritis in preparation for a larger trial. The secondary aim of this study is to explore change in physical performance and quality of life after the intervention. We recruited Spanish speaking, Hispanic American older adults, greater than the age of 50 years old out of a large urban integrated medical center who have moderate knee osteoarthritis. The physical therapy intervention includes individualized and progressive lower extremity strength training, progressive stationary bicycle high-velocity training, self-management training and manual therapy. The physical therapist prescribed an individualized home exercise program to all participants including strength training and adherence to this program was monitored throughout the study duration. Participants were advised to participate in cardiovascular exercise outside the clinic. The duration of the study is 12-weeks and participants received 10, small-group, physical therapist led, 75-minute multimodal physical therapy sessions in the clinic over the first 8-weeks followed by 4 individual weekly phone sessions to measure adherence to exercise. To measure feasibility, we expected to recruit 20 participants, exercise adherence to be 3-days per week and to retain 70% of the cohort at the post-testing evaluation session at the end of the intervention.

**General information**

Title: Feasibility of Multimodal Physical Therapy in Hispanic American Older Adults with Moderate Knee Osteoarthritis, ClinicalTrials.gov repository, identifier (NCT04219423, 3/01/2020)

Sponsor/funder: Kaiser Permanente Northern California Community Benefits grants program (RNG021024), Kaiser Permanente Northern California Division of Research (DOR) 4480 Hacienda Dr, Pleasanton, CA 94588

Investigators and locations for intervention: Amy Gladin PT, DPT was the Principal Investigator and responsible for design and oversite of all aspects of this study. The intervention was conducted at Kaiser Permanente San Francisco Medical Center Physical Therapy offices located at, 1635 Divisadero Street, Suite 300, San Francisco, CA 94115 and 1600 Owens Street, San Francisco, CA 94158. Phone number: 415-833-4325. The intervention physical therapists were Alexis Anderson PT, DPT, Mary-Edna Harrell PT, FAAOMT, Jillian Cripps PT, DPT, OCS, FAAOMT, Tony Tran PT, DPT, SCS, FAAOMT, Catherine Brunswick PT, DPT, OCS, Susana Robles, PT, DPT.

Kaiser Permanente Northern California Division of Research provided biostatistical support for this study. 4480 Hacienda Dr, Pleasanton, CA 94588, phone: (866) 454-8855.

**Study goals and objectives**

The primary purpose of this pilot study was to explore the feasibility of participant recruitment, exercise and clinic session adherence, and retention after multimodal physical therapy in Spanish-speaking, older (age 50 or greater) HA adults with moderate knee OA. The secondary aim was to explore the changes in health-related quality of life, physical function, and quadriceps strength after the intervention. Results from this study inform a larger planned clinical trial.

**Study design**

This is a pragmatic, observational, descriptive pre/post study. This is an exploratory study and not a hypothesis generated study.

The inclusion criteria were as follows: identify as Hispanic American, Spanish language preference, speaking Spanish at home, age 50 or greater, radiographic knee OA Kellgren-Lawrence (KL) grade ≥ 2 or at least one compartment rated with moderate OA, knee pain in the previous 30 days, ability to walk inside home without a cane, able to walk ¼ block without a cane, and able to go up one flight of stairs without physical assistance. Exclusion criteria were a history of lower extremity joint arthroplasty, body mass index > 40 kg/m2, neurologic dysfunction impacting functional mobility, unstable cardiovascular disease, and uncontrolled psychiatric or behavioral problems preventing the ability to participate in a group exercise program.

The study duration is 12-weeks. The intervention was led in Spanish by PTs conversant in Spanish and all written study material was translated by a bilingual health educator.

**Methodology for the multimodal physical therapy intervention:**

Table 1.

| Weeks 1-2: 75 minutes multimodal physical therapy 2 times per week for 2 weeks, in clinic | | | |
| --- | --- | --- | --- |
| Bike  10-20 minutes | Strengthening  40 minutes | Manual Therapy10 min | Cooldown  10 minutes |
| 10-minute stationary bike at 50% predicted heart rate max | Physical therapist prescribes 5-7 strength exercises from the following list:    Quadriceps open chain: Quadricep isometrics, seated or supine knee extension, supine straight leg raises.  Gluteal open chain: side lying hip abduction/external rotation (clam), hip abduction, supine bridge.  Closed-chain lower extremity: progressive squats, step-up anteriorly or laterally, standing hip abduction, standing hip extension, banded-at-knee side stepping, progressive forward and lateral lunges and calf raises.  HEP initiated and updated handouts provided weekly. | Assess and treat at least once | 5 min  Lower extremity stretching:  quadricep, hamstring, hip flexor, and calf  PT prescribes HEP for flexibility.    Ice optional |
| Weeks 3-6: 75 minutes multimodal physical therapy 1-time per week for 4 weeks, in clinic | | | |
| Bike  10-20 minutes | Strengthening  40 minutes | Manual Therapy10 minutes | Cooldown  5 minutes |
| 10-minute warm up.  High-velocity training: 3-6 repetitions of 10-30 second fast cadence intervals at moderate intensity on 1-to-2-minute rests | PT selects exercises from list above and prescribes resistance. PT customizes intensity and dose of strength exercise based on one-repetition maximum estimations and rate of perceived exertion. PT progresses exercises to therapeutic zone of 60 to 80% one-repetition maximum or perceived exertion. PT prescribes 8 to 12 repetitions, 2 to 3 sets per exercise, 3-days per week for 5-7 strength exercises. Weights and bands issued to patients to perform HEP at home.  HEP prescribed and updated handouts provided weekly. | Assess and treat at least once | 10 minutes  Lower extremity stretching.  Participants practice flexibility HEP.  Ice optional |
| Weeks 8-12: 30-minute weekly phone or video visit adherence check, support and advice | | | |
| n/a | Continue 5-7 strength exercises at home at least 3 days per week in a therapeutic zone. Continue recommended flexibility exercises. Advise participants to walk for exercise. Provide support and answer questions about HEP. One-week recall of exercise adherence. | n/a | n/a |

**Individualized lower extremity strength training**

Participants were instructed to perform progressive lower extremity strengthening with a specific focus on bilateral quadriceps and gluteal groups.1-3 The physical therapist (PT) selected and prescribed strength exercises from a list utilizing a standardized protocol (Table 1), and PTs were encouraged to personalize the dose of exercise based on the participants' capabilities and symptoms.4-6 Specific strength exercises used in the intervention are adapted from previous clinical trials in knee OA populations demonstrating efficacy. 5,7-9 The PT used tactile assessment of quadriceps function, movement assessment during gait, squatting, step up and single leg standing, and clinical decision making to determine the individualized exercise prescription.9,10 The PT instructed the participants in 5-to-7 strength exercises over the first 2 weeks. Exercises were practiced in the clinic with immediate feedback, and feedback was progressively decreased to ensure motor learning of each exercise.11 No resistance was used for the first one-to-two weeks of the intervention to gradually introduce joint loads.11 Once participants were able to demonstrate 10 repetitions of an exercise safely in the clinic without feedback, participants were asked to perform the exercise at home. Participants were advised to exercise 3 times per week, including both in-clinic sessions and HEP participation for the 12-week study duration.11,12

Two consistent themes were maintained during exercise instruction sessions, participants are instructed to maintain neutral knee alignment (knee in line with 2nd toes) and discouraged from allowing knee to track beyond toes with closed chain exercise with all closed-chain exercises.7,9 Second, participants are instructed to maintain good posture and alignment during all exercises.9

To support adherence with HEP, participants were provided weekly customized exercise handouts in Spanish (translated by study team) with prescribed exercises, repetitions, resistance levels, and frequencies. If participants wished to exercise more than 3 days per week, the PT modified the exercise dose and updated it in the weekly handout. Weekly adherence to HEP was recorded using a 1-week recall for the 12-week study period.

*Determination of dose of strength training.*Resistance for strength exercises was determined by a PT one to two weeks into the intervention. Resistance intensity was determined using a modified one-repetition maximum (1RM) technique for leg press, supine terminal knee extension, and side-lying gluteal (‘clam’) exercise (see below for descriptions).11,13,14 The PT used the Rate of Perceived Exertion (RPE) 0-10 Borg scale to dose other strength exercises. Participants were asked to make the first two-to-three repetitions of an exercise feel ‘somewhat hard’ (4/10 RPE) to ‘hard’ (5/10 RPE) which estimates 50% of 1RM.11,14 After 1RM estimations, participants began strength training exercises at 50% of their 1RM recommended for novice exercisers.11 Resistance exercises were progressed individually during the 12-week study utilizing the RPE scale to target 60% to 80% of 1RM which is the recommended intensity to improve strength in older adults.5,7,11,14 The PT individualized and progressed dose (intensity, repetitions and frequency) of exercise based on each participants individual capabilities and symptoms, exercise performance and overload principles4-6. Strength exercises were performed for 8-10 repetitions for 2-3 sets.11,14 When participants could perform exercises safely and without feedback in the clinic, they were provided with resistance bands and weights and were asked to perform strength exercises at home for a total of 3 days per week, including days in the clinic. If participants wanted to exercise more than 3-days per week, dose of strength exercise was modified by the physical therapist.

*One-repetition maximum testing description.* Closed-chain squat on leg press, one- repetition maximum (1RM) was estimated in closed-chain on the leg press from 90 degrees of hip and knee flexion to controlled full knee extension and 20 degrees of hip flexion in bilateral stance. Initial weight for leg-press 1RM testing was based on physical therapist assessment or 50% of the participants body weight. Participants rested 1 minute between efforts. Resistance was increased in 10-to-20-pound intervals. 1RM was estimated by both the participants and physical therapist assessment of the maximum weight the participant could perform in a controlled and safe manner. Participants could terminate the 1RM test progression if they felt they reached their maximum weight during a testing effort.

One-repetition maximumwas estimated in open-chain for the gluteal muscle group using a modified HipSIT test.13 Participants were positioned in side-lying with testing leg in superior position, both legs were positioned at 45 degrees of hip flexion and knees at 90 degrees (‘clam’ position). The physical therapist selected the initial resistance band (TherabandTM varying between 3 and 15 pounds when stretched 100 to 200% of length) and the band was secured around the distal femurs. Participants were instructed to lift their top knee while keeping heels together as high as they could while keeping the pelvis in a perpendicular position in relation to the mat. The physical therapist monitored ability to hold end-range positioning for 3 seconds. Participants rested at least 1 minute between 1RM testing. The bands were advanced until the participant was unable to hold the end range position for 3 seconds.

One-repetition maximum was estimated for the quadriceps in closed-chain by having participants positioned supine with a 6-inch bolster under one knee. 1RM was tested individually in both knees. Ankle weights were placed on the distal tibia. 1RM was determined by the participants ability to hold terminal knee extension for 3 seconds by visual inspection from the physical therapist. Participants rested for 1-minute between efforts. Twenty pounds of ankle weights was the maximum for each knee.

**Lower extremity flexibility exercise**

Participants performed 10-minutes lower extremity cool-down stretches at the end of every in-clinic session, including quadriceps, hip flexors, hamstrings, and calf muscle groups (Table 1). The PT prescribed flexibility exercises for HEP based on observation and clinical assessment during in-clinic sessions and included them in the weekly home exercise program handout if they were needed. Stretches were held for 20 to 60 seconds and repeated 2-5 times.11

**Progressive stationary bicycle**

Bicycle exercise was gradually introduced over the first two weeks without resistance for 10-20 minutes. Participants were encouraged to exercise at an intensity expressed as 50% of the predicted heart rate max for the first two weeks.11 After which they began high-velocity cadence training. High-velocity training has been associated with improved muscle power production, which, in turn, may be a more proximal predictor of physical function.15-17 Participants warmed up on a bike for 5-10 minutes and then were instructed to pedal quickly at a moderate intensity (RPE 4/10 Borg scale) for 10 to 30 seconds for 3-6 repetitions on 1-2 minute, self-selected rest.11 Participants were instructed to pedal quickly while keeping their buttocks in the saddle, encouraging an increase of approximately 10-20 revolutions per minute during high-velocity intervals. Participants were educated about signs and symptoms of cardiac arrest.

**Self-management education**

A brief education and self-management topic were covered during the first 10 minutes of every in-clinic session while the participants were warming up on the bike. Topics covered were designed to promote self-efficacy in managing knee OA.18 Topics covered included: anatomy and asymptomatic prevalence to reduce fear, the importance of healthy weight and physical activity in managing OA, mental health and impact on pain, sleep hygiene and basic self-care (heat, ice, compression, elevation, shoes). Participants were also provided with resources on how to access free weight management training and mental health services in Spanish within the integrated health system, and information on exercise options at local senior centers and pools in the area.

**Manual therapy**

During the first week, the PT assessed the tibiofemoral and patellofemoral joint mobility and knee soft tissue mobility for 10-minutes. Allocation of manual therapy was determined by the PT based on assessment of the quality of joint and soft tissue mobility and symptomatic change in range of motion and/or physical function aggravating factors with manual therapy techniques (such as sit-to-stand, squat, knee range of motion, step-up/down).19-21 Each participant received at least two episodes of manual therapy assessment during the first and fourth or fifth week and if the PT determined that the participant needed manual therapy, the sessions were approximately 10 minutes in duration at a frequency determined by the PT. The details of the manual therapy techniques have been described elsewhere.19-21

**Safety considerations**

The biggest risk to participants is risk of joint or muscle pain or soreness with exercise and loss of privacy. To mitigate joint/muscle pain risk, weekly safety logs were completed by the principal investigator inquiring about pain, new injuries and adherence to HEP. The Principal Investigator, a PT, reviewed the safety logs every week and collaborated with the intervention PTs to make modifications to the exercise if needed. All research staff also took part in training on how to identify and report adverse events, private health information protection and human research ethics. Participants were also educated about signs and symptoms of cardiac arrest per a recommendation from the Kaiser Permanente Northern California Institutional Review Board. To protect participants privacy, data was stored behind an institutional fire-wall and encoded by a deidentified mnemonic to protect participants privacy. Private health information was destroyed at the end of the study.

**Quality assurance**

The principal investigator trained all interventionists and attended and monitored all intervention clinic sessions to ensure fidelity to the intervention. A study manual was created for all physical performance measures adapted from previous authors and translated into Spanish by the bilingual health educator.22,23 The principal investigator attended and monitored the first 6 participants pre-intervention and post-intervention testing sessions with the testing physical therapists to ensure fidelity to testing procedure. Lastly, to ensure fidelity to outcome measurement testing, the PTs stated outcome measure instructions in English, and an interpreter repeated the instructions in Spanish per the study manual.

**Expected outcomes of the study**

We expect to recruit 20 participants and for participants to exercise 3-days per week and to retain 70% of the cohort.

**Dissemination of results and publication policy**

We presented this study as a poster at the 2019 American Physical Therapy Association Combined Sections Conference.

**Informed Consent forms**

Available upon request

**References**

1 Raghava Neelapala, Y. V., Bhagat, M. & Shah, P. Hip Muscle Strengthening for Knee Osteoarthritis: A Systematic Review of Literature. *J Geriatr Phys Ther* **43**, 89-98 (2020). <https://doi.org:10.1519/jpt.0000000000000214>

2 Hislop, A. C., Collins, N. J., Tucker, K., Deasy, M. & Semciw, A. I. Does adding hip exercises to quadriceps exercises result in superior outcomes in pain, function and quality of life for people with knee osteoarthritis? A systematic review and meta-analysis. *Br J Sports Med* **54**, 263-271 (2020). <https://doi.org:10.1136/bjsports-2018-099683>

3 Pietrosimone, B. G., Hertel, J., Ingersoll, C. D., Hart, J. M. & Saliba, S. A. Voluntary quadriceps activation deficits in patients with tibiofemoral osteoarthritis: a meta-analysis. *Pm r* **3**, 153-162; quiz 162 (2011). <https://doi.org:10.1016/j.pmrj.2010.07.485>

4 Bennell, K. L. *et al.* Better Knee, Better Me™: effectiveness of two scalable health care interventions supporting self-management for knee osteoarthritis - protocol for a randomized controlled trial. *BMC Musculoskelet Disord* **21**, 160 (2020). <https://doi.org:10.1186/s12891-020-3166-z>

5 Bennell, K. L., Hunt, M. A., Wrigley, T. V., Hunter, D. J. & Hinman, R. S. The effects of hip muscle strengthening on knee load, pain, and function in people with knee osteoarthritis: a protocol for a randomised, single-blind controlled trial. *BMC Musculoskelet Disord* **8**, 121 (2007). <https://doi.org:10.1186/1471-2474-8-121>

6 Barker, K. L. *et al.* Physiotherapy Rehabilitation for Osteoporotic Vertebral Fracture (PROVE): study protocol for a randomised controlled trial. *Trials* **15**, 22 (2014). <https://doi.org:10.1186/1745-6215-15-22>

7 Bennell, K. L. *et al.* Neuromuscular versus quadriceps strengthening exercise in patients with medial knee osteoarthritis and varus malalignment: a randomized controlled trial. *Arthritis Rheumatol* **66**, 950-959 (2014). <https://doi.org:10.1002/art.38317>

8 Bennell, K. L. *et al.* Effectiveness of an Internet-Delivered Exercise and Pain-Coping Skills Training Intervention for Persons With Chronic Knee Pain: A Randomized Trial. *Ann Intern Med* **166**, 453-462 (2017). <https://doi.org:10.7326/m16-1714>

9 Ageberg, E., Link, A. & Roos, E. M. Feasibility of neuromuscular training in patients with severe hip or knee OA: The individualized goal-based NEMEX-TJR training program. *BMC Musculoskeletal Disorders* **11**, 126 (2010). <https://doi.org:10.1186/1471-2474-11-126>

10 Bennell, K. L. *et al.* Comparison of neuromuscular and quadriceps strengthening exercise in the treatment of varus malaligned knees with medial knee osteoarthritis: a randomised controlled trial protocol. *BMC Musculoskelet Disord* **12**, 276 (2011). <https://doi.org:10.1186/1471-2474-12-276>

11 American College of Sports, M. ACSM'S Guidelines for Exercise Testing and Prescription. *Wolters Kluwer* (2021).

12 Chodzko-Zajko, W. J. *et al.* Exercise and Physical Activity for Older Adults: American College of Sports Medicine (ACSM) position stand. *MSSE* **41**, 687-708 (2009). <https://doi.org:10.1249/MSS.0b013e3181915670>

13 Almeida, G. P. L., das Neves Rodrigues, H. L., de Freitas, B. W. & de Paula Lima, P. O. Reliability and Validity of the Hip Stability Isometric Test (HipSIT): A New Method to Assess Hip Posterolateral Muscle Strength. *J Orthop Sports Phys Ther* **47**, 906-913 (2017). <https://doi.org:10.2519/jospt.2017.7274>

14 American College of Sports, M. *et al.* American College of Sports Medicine position stand. Exercise and physical activity for older adults. *Med Sci Sports Exerc* **41**, 1510-1530 (2009). <https://doi.org:10.1249/MSS.0b013e3181a0c95c>

15 Sayers, S. P., Gibson, K. & Cook, C. R. Effect of high-speed power training on muscle performance, function, and pain in older adults with knee osteoarthritis: a pilot investigation. *Arthritis Care Res (Hoboken)* **64**, 46-53 (2012). <https://doi.org:10.1002/acr.20675>

16 Accettura, A. J., Brenneman, E. C., Stratford, P. W. & Maly, M. R. Knee Extensor Power Relates to Mobility Performance in People With Knee Osteoarthritis: Cross-Sectional Analysis. *Phys Ther* **95**, 989-995 (2015). <https://doi.org:10.2522/ptj.20140360>

17 Pelletier, D., Gingras-Hill, C. & Boissy, P. Power training in patients with knee osteoarthritis: a pilot study on feasibility and efficacy. *Physiother Can* **65**, 176-182 (2013). <https://doi.org:10.3138/ptc.2012-05>

18 LeFort, S. *et al.* Vivir una vida sana con dolor cronico. (2016).

19 Deyle, G. D. *et al.* Physical therapy treatment effectiveness for osteoarthritis of the knee: a randomized comparison of supervised clinical exercise and manual therapy procedures versus a home exercise program. *Phys Ther* **85**, 1301-1317 (2005).

20 Abbott, J. H. *et al.* The Incremental Effects of Manual Therapy or Booster Sessions in Addition to Exercise Therapy for Knee Osteoarthritis: A Randomized Clinical Trial. *J Orthop Sports Phys Ther* **45**, 975-983 (2015). <https://doi.org:10.2519/jospt.2015.6015>

21 Abbott, J. H. *et al.* Manual therapy, exercise therapy, or both, in addition to usual care, for osteoarthritis of the hip or knee: a randomized controlled trial. 1: clinical effectiveness. *Osteoarthritis Cartilage* **21**, 525-534 (2013). <https://doi.org:10.1016/j.joca.2012.12.014>

22 Bennell, K., Dobson, F. & Hinman, R. Measures of physical performance assessments: Self-Paced Walk Test (SPWT), Stair Climb Test (SCT), Six-Minute Walk Test (6MWT), Chair Stand Test (CST), Timed Up & Go (TUG), Sock Test, Lift and Carry Test (LCT), and Car Task. *Arthritis Care Res (Hoboken)* **63 Suppl 11**, S350-370 (2011). <https://doi.org:10.1002/acr.20538>

23 Logerstedt, D. S., Snyder-Mackler, L., Ritter, R. C. & Axe, M. J. Knee pain and mobility impairments: meniscal and articular cartilage lesions. *J Orthop Sports Phys Ther* **40**, A1-a35 (2010). <https://doi.org:10.2519/jospt.2010.0304>
